# Supplementary material for: Zeaxanthin-Rich Extract from Superfood Lycium barbarum Selectively Modulates the Cellular Adhesion and MAPK Signaling in Melanoma versus Normal Skin Cells In Vitro
Source: PubMed Central journal article supplement (PMC7827977; doi:10.3390/molecules26020333), 2021-01-11
Supplement: molecules-26-00333-s001.pdf [file molecules-26-00333-s001.pdf]

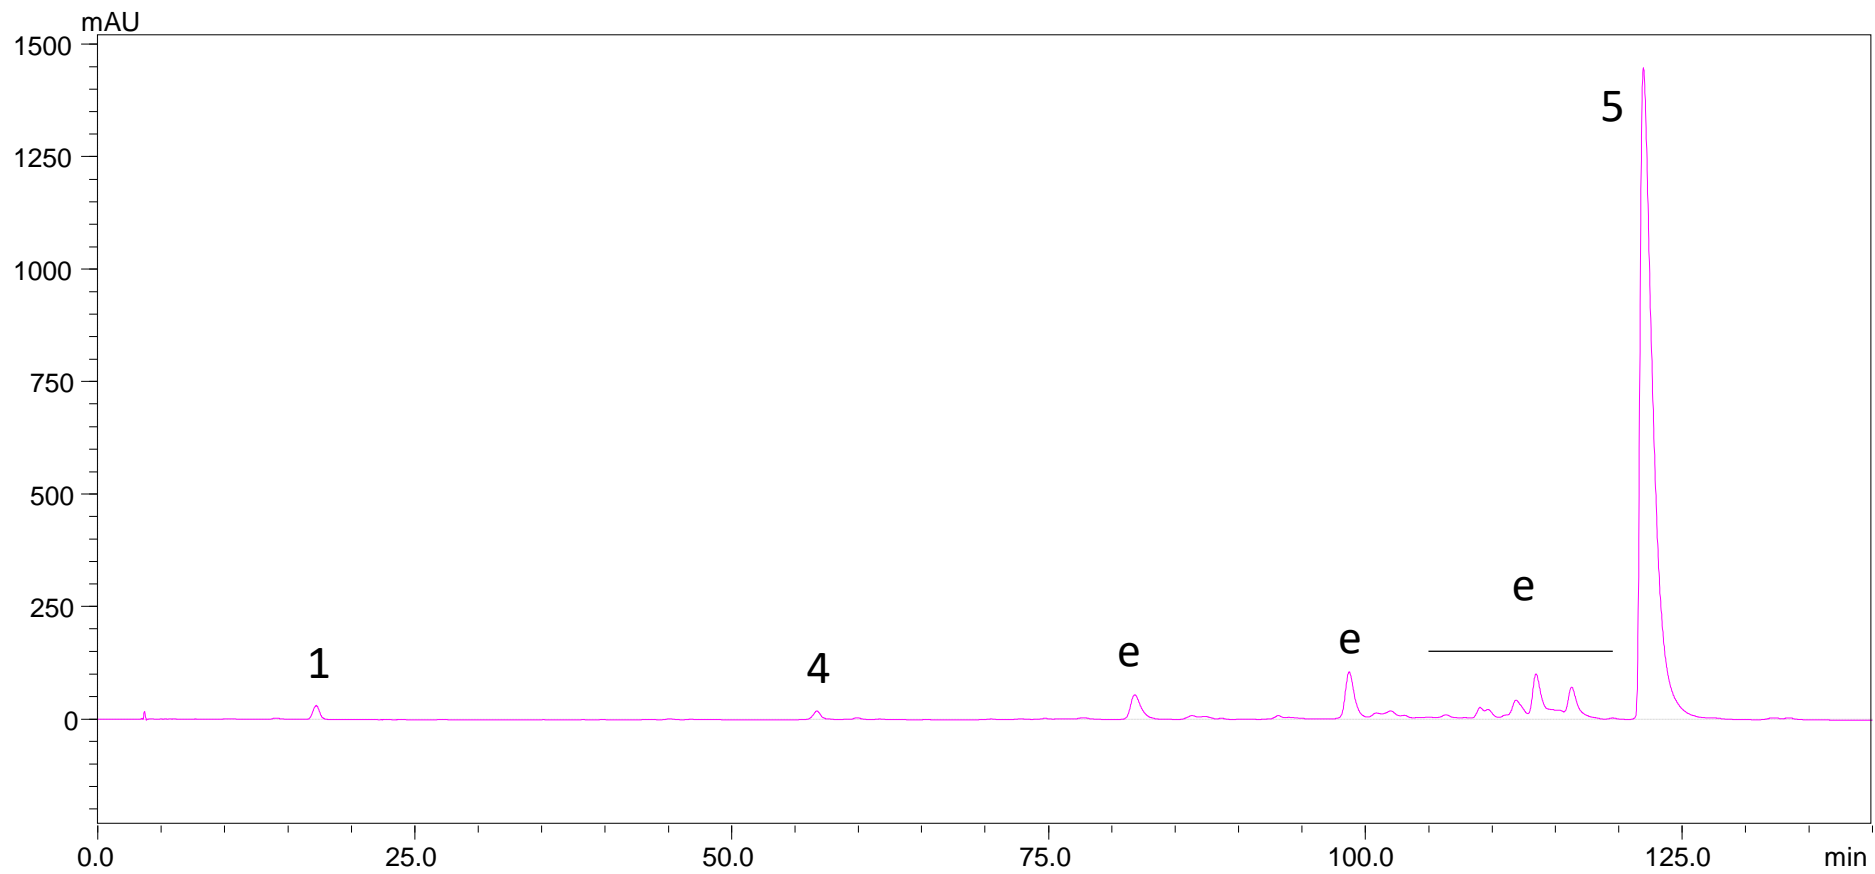

Figure S1. The major compound in the unsaponified extract was zeaxanthin dipalmitate (peak 5 )
